# Supplementary material for: “Aggregation induced phosphorescence” active “rollover” iridium(iii) complex as a multi-stimuli-responsive luminescence material
Source: Royal Society of Chemistry journal article supplement (doi:10.1039/c4dt03424d), 2015-01-01
Supplement: c4dt03424d1.pdf [file c4dt03424d1.pdf]

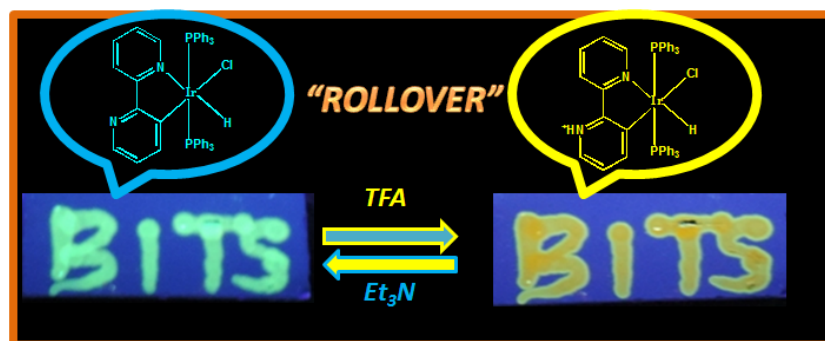

An 'aggregation induced phosphorescence (AIP)' active rollover complex was synthesized and verified its capability as Multi-Stimuli-Responsive smart luminescence material.



Parvej\_26092013

F31CPD CDCl3 /opt/topspin nmr50 55

-7.93

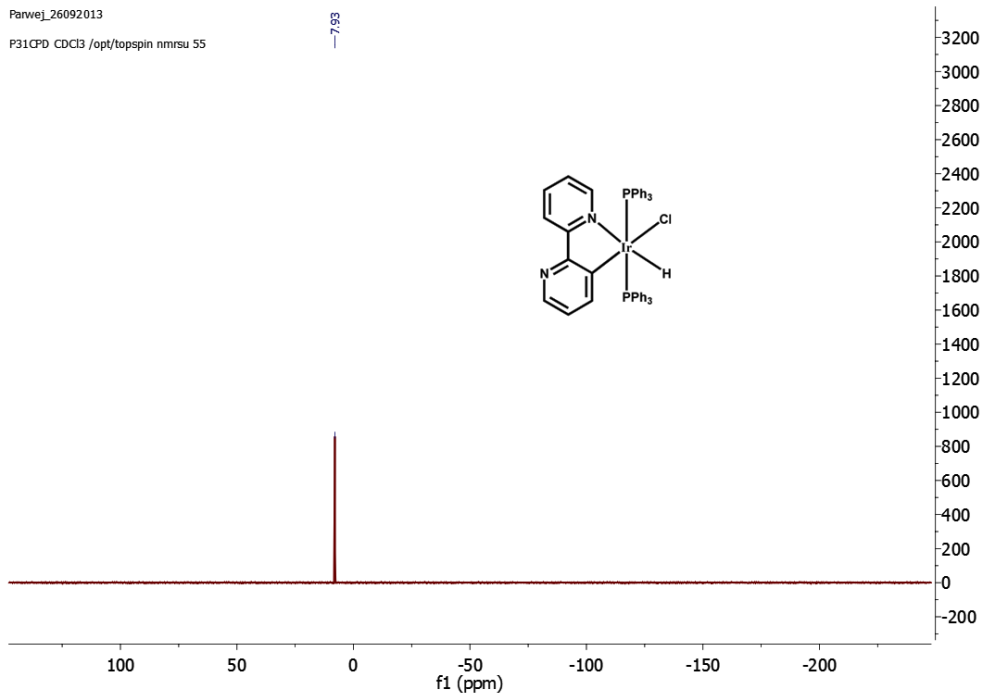

b

Parvej\_26092013

Ir 512 A

Cl3CPD CDCl3 /opt/topspin nmr50 55

163.21  
129.29  
149.37  
149.18  
140.41  
138.90  
133.94  
133.88  
131.85  
131.89  
129.12  
127.45  
127.36  
126.81  
119.77

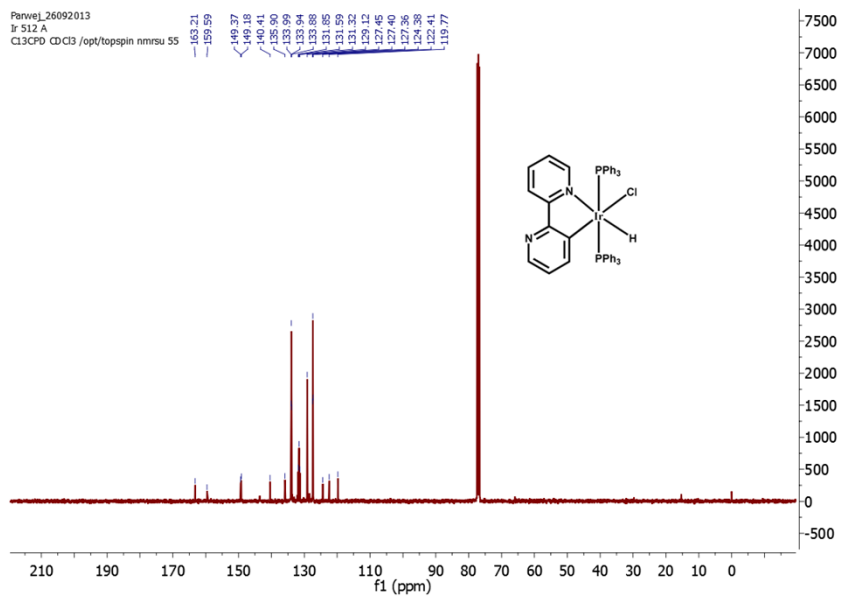

C

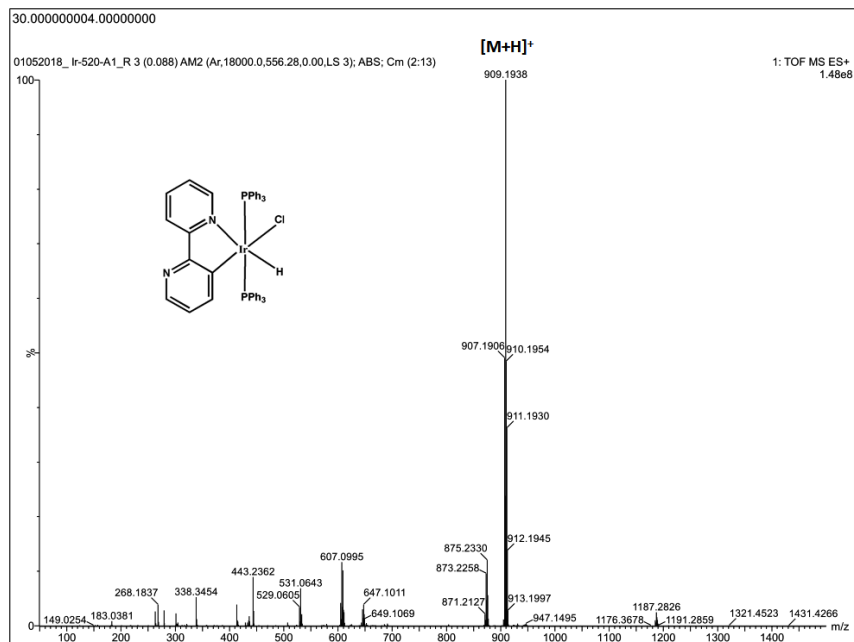

**Fig. S1** (<sup>1</sup>H, <sup>31</sup>P, <sup>13</sup>C) NMR spectra and HRMS (a, b, c and d), respectively for [Ir(bipy-H)].

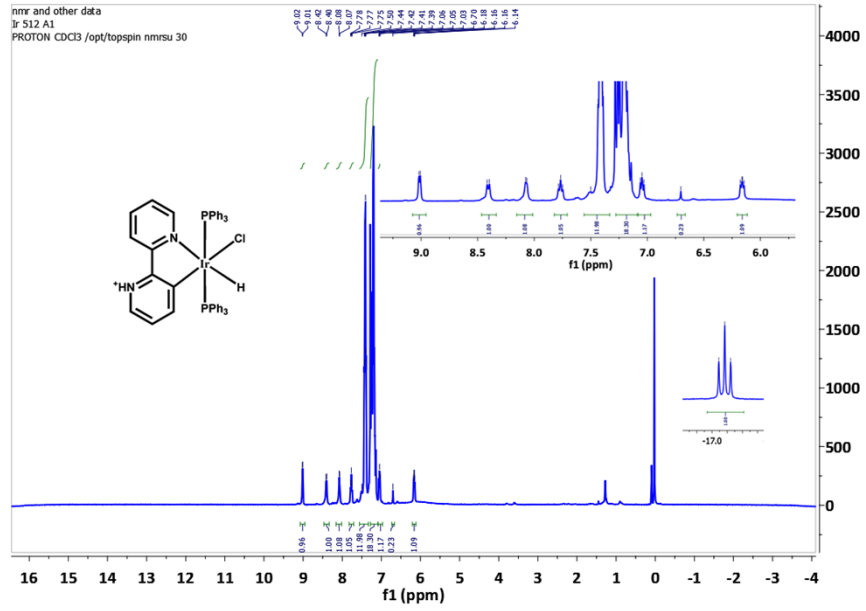

a

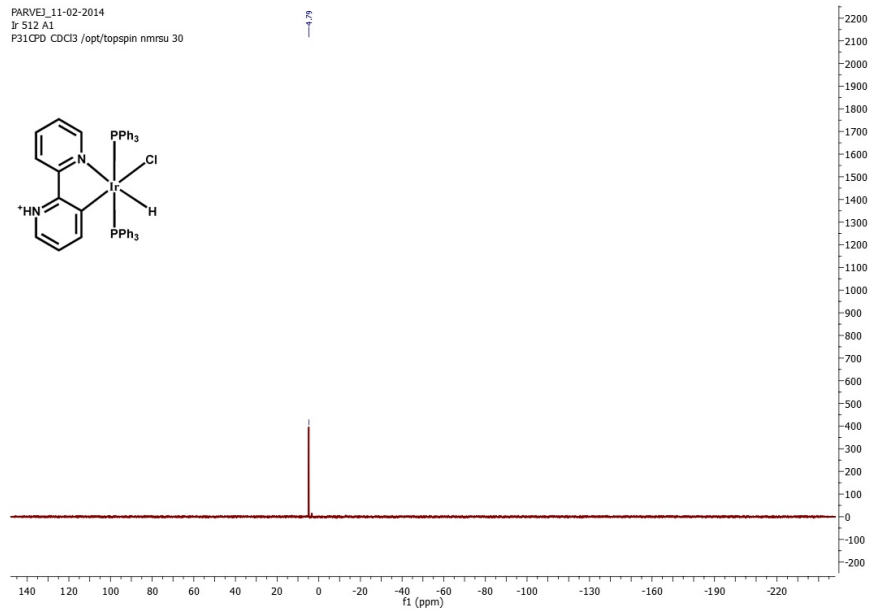

b

Fig.S2 ( $^1\text{H}$  and  $^{31}\text{P}$ ), NMR spectra (a, b), respectively for  $[\text{Ir}(\text{bipy-H})\text{H}]^+$  in  $\text{CDCl}_3$ .

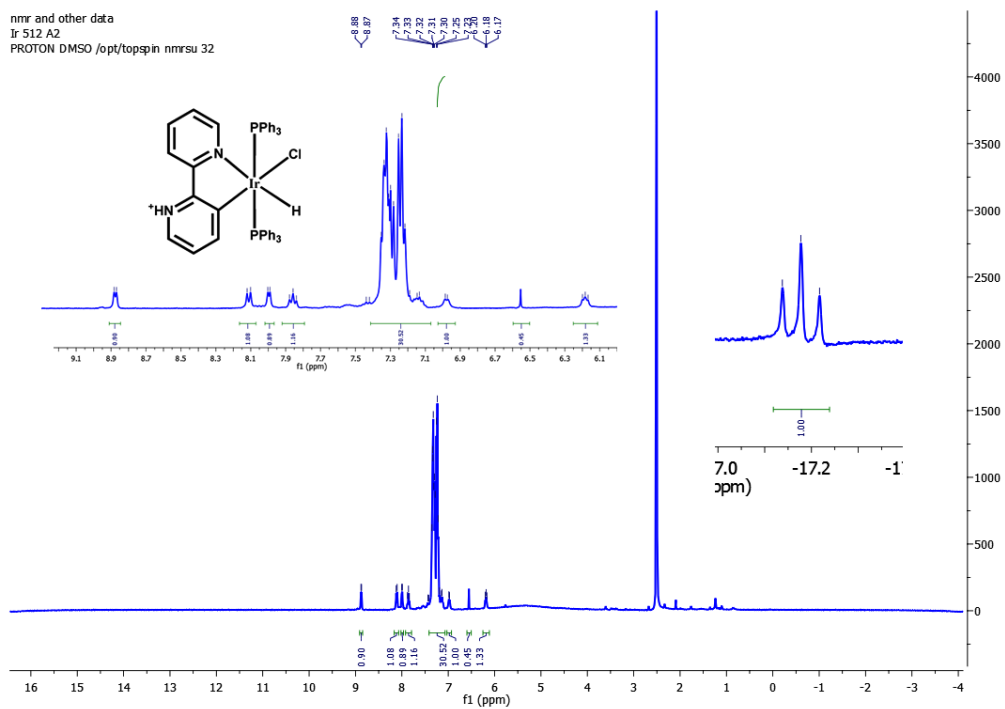

a

PARVEI\_11-02-2014  
Ir 512 A2  
F31CPD DMSO /opt/topspin nmrsu 32

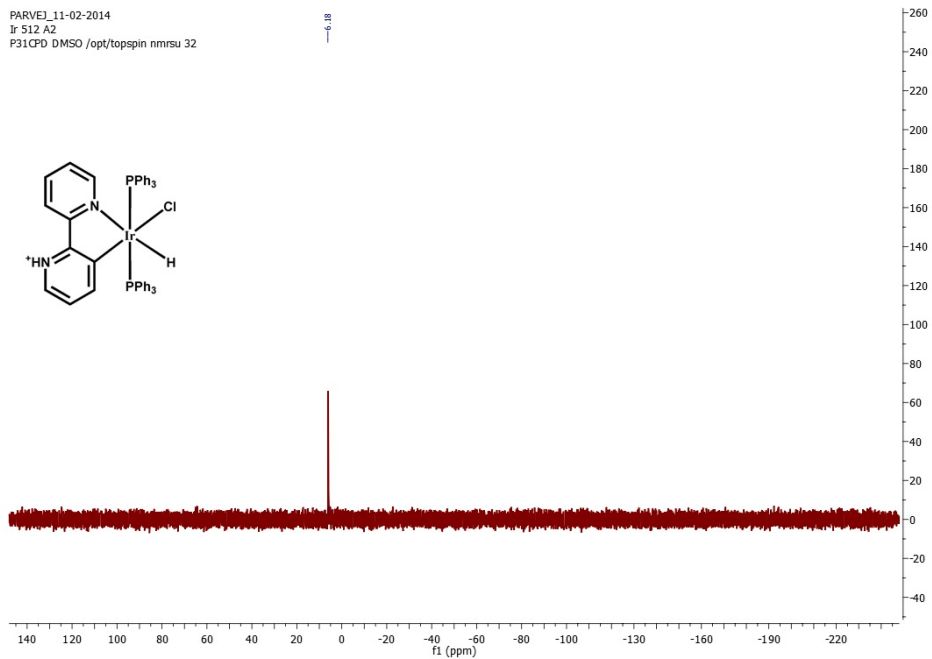

b

**Fig.S3** ( $^1\text{H}$  and  $^{31}\text{P}$ ), NMR spectra (**a**, **b**), respectively for  $[\text{Ir}(\text{bipy-H})\text{H}]^+$  in  $\text{DMSO-d}_6$ .

arc-mar07-2014  
BF 3 1  
PROTON CDCl3 /opt/topspin nmr5u 15

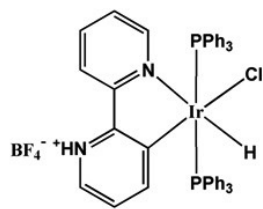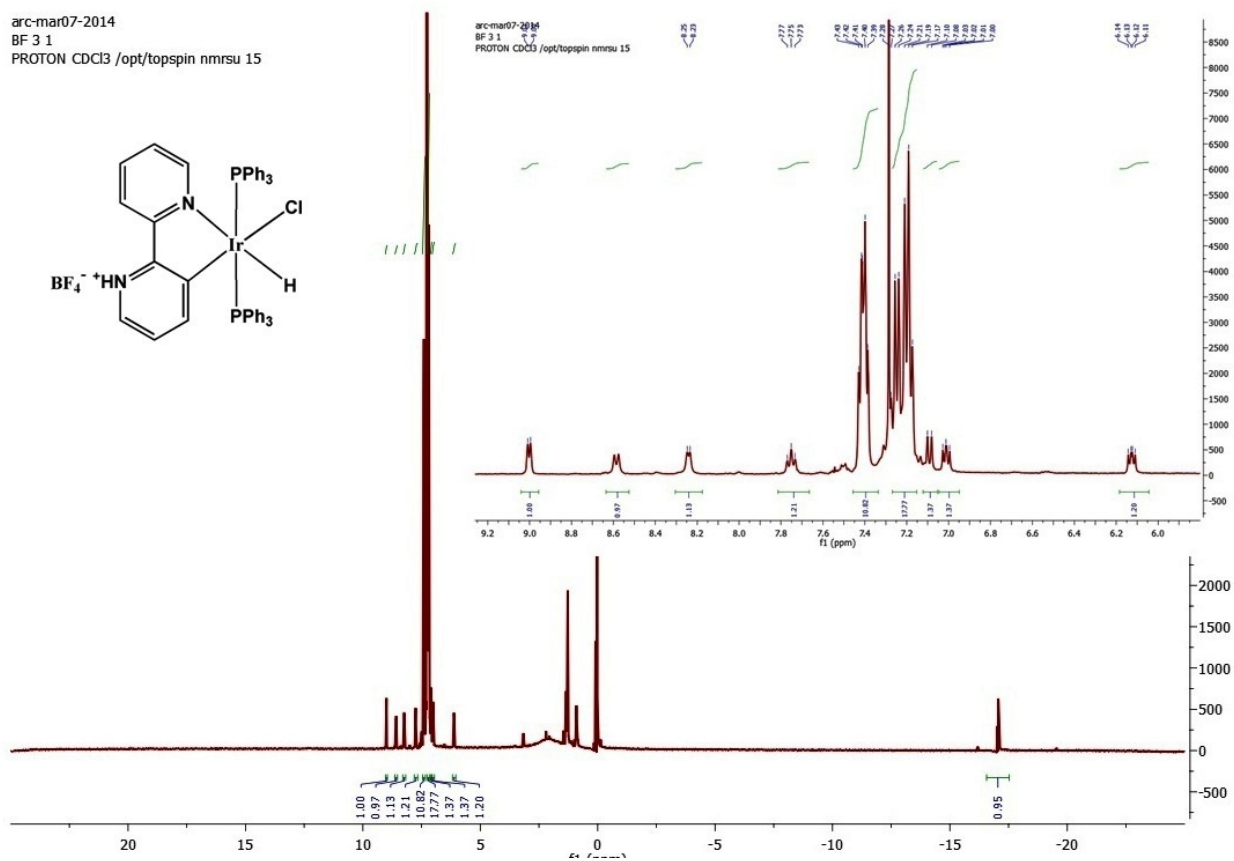

a



arc-mar07-2014  
BF 3 1  
P31CPD CDCl3 /opt/topspin

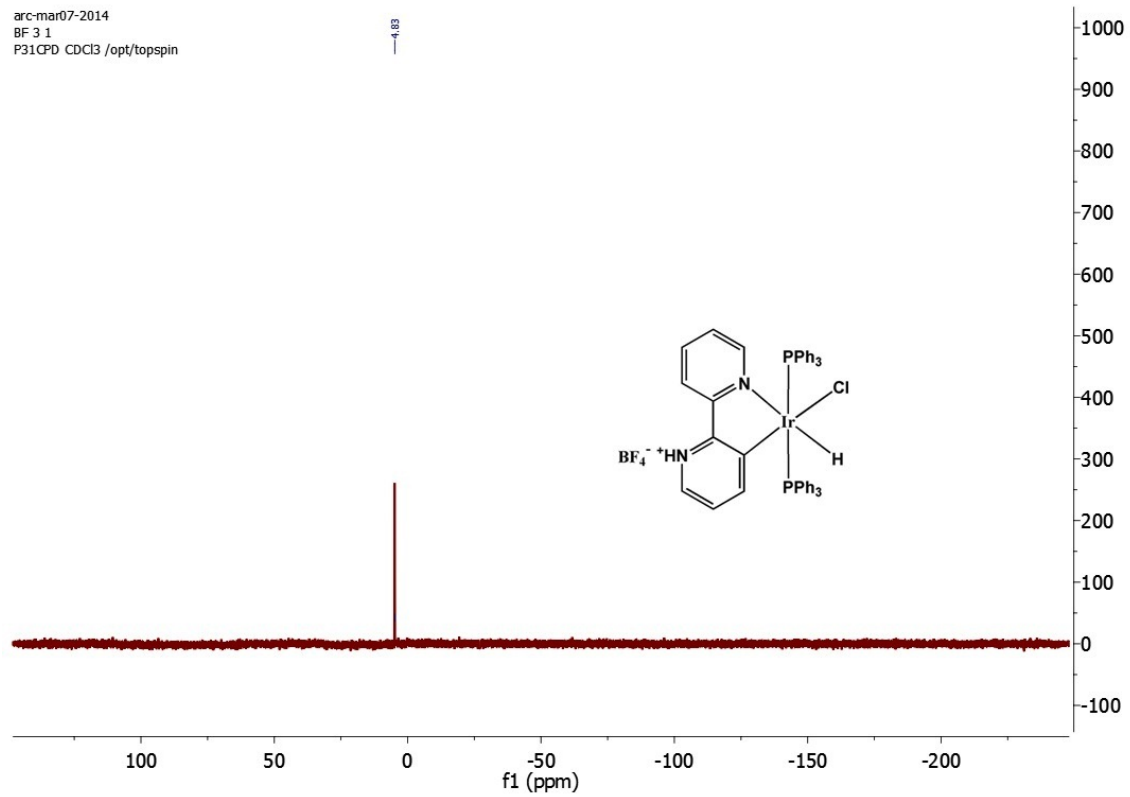

**Fig.S4** ( $^1\text{H}$ ,  $^{31}\text{P}$ ,) NMR spectra (a and b), respectively for  $[\text{Ir}(\text{bipy-H})\text{H}]^+ \text{BF}_4^-$  in  $\text{CDCl}_3$ .

arc-mar07-2014  
BF 3 2  
PROTON DMSO /opt/topspin nmrsu 16

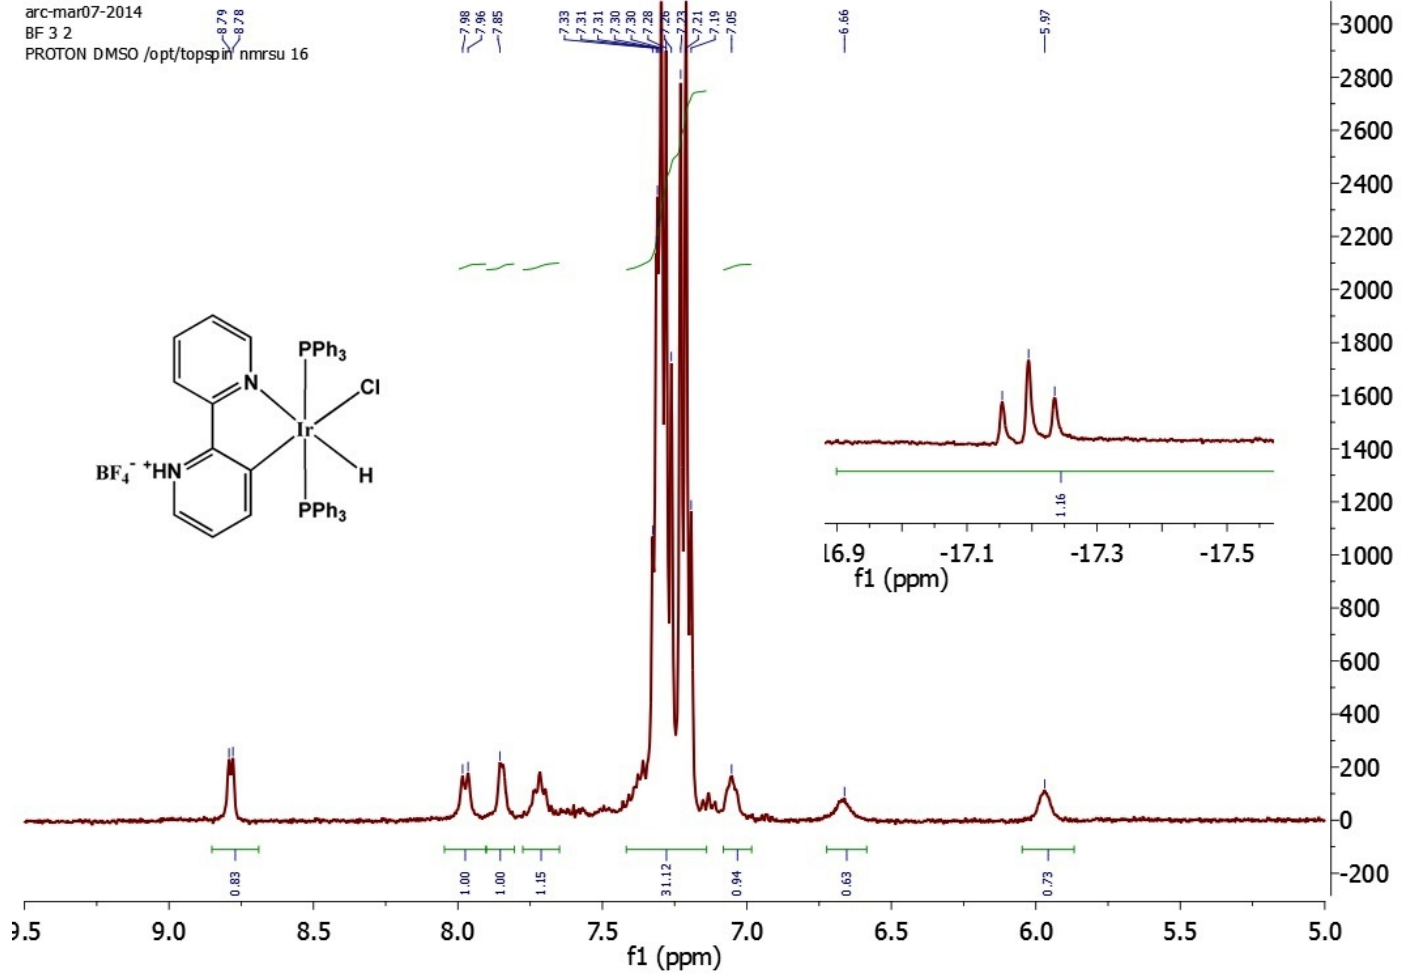

a

arc-mar07-2014  
BF 3 2  
P31CPD DMSO /opt/topspin nmrsu 16

6.19

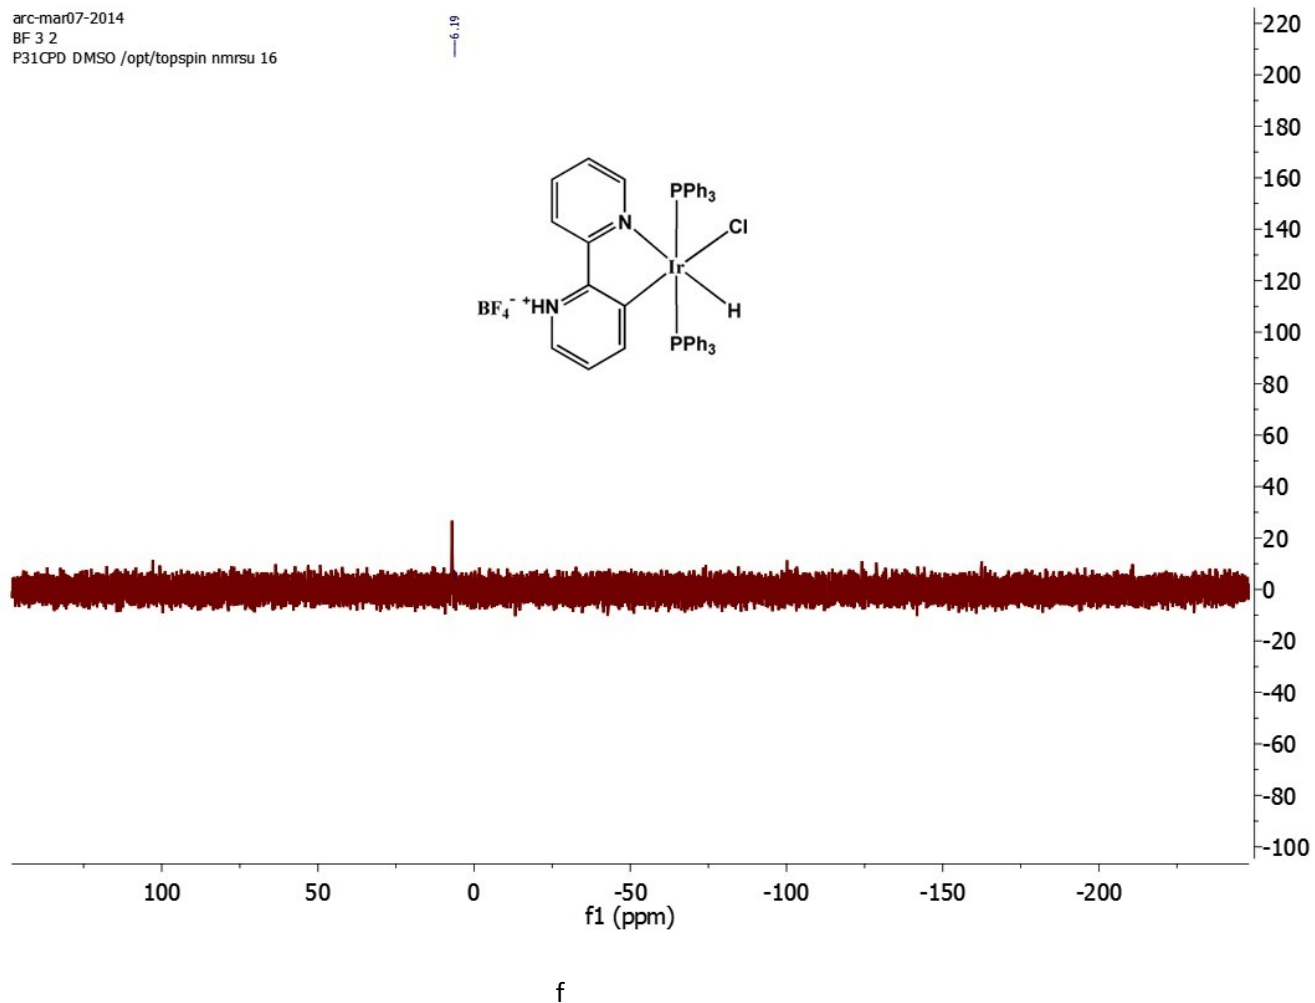

**Fig.S5** ( $^1\text{H}$ ,  $^{31}\text{P}$ ,) NMR spectra (a and b), respectively for  $[\text{Ir}(\text{bipy-H})\text{H}^+\text{BF}_4^-]$  in  $\text{DMSO-d}_6$ .

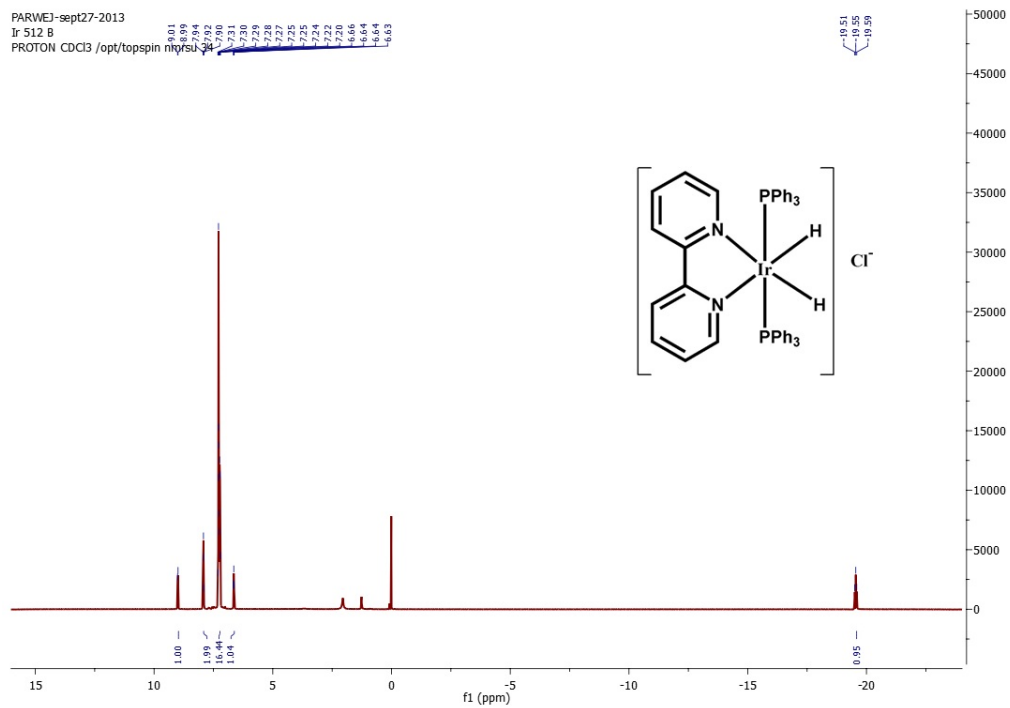

**Fig.S6**  $^1\text{H}$ , NMR spectra for  $[\text{Ir}(\text{bipy})(\text{H}_2)(\text{PPh}_3)_2]$

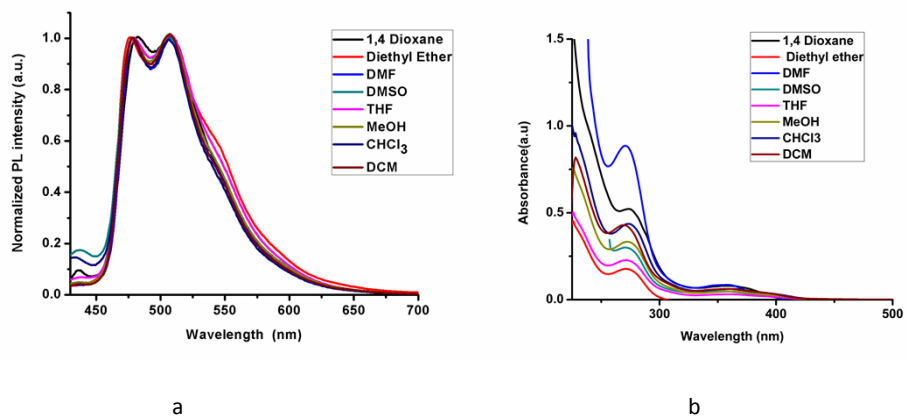

**Fig.S7** Emission and Absorption spectra of [Ir(bipy-H)] in different solvents.

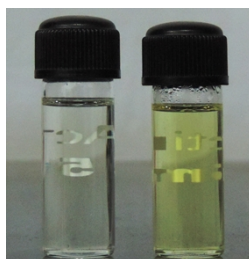

**Fig.S8** photo of [Ir(bipy-H)] in DCM (left) and DCM +TFA (right) under day light.

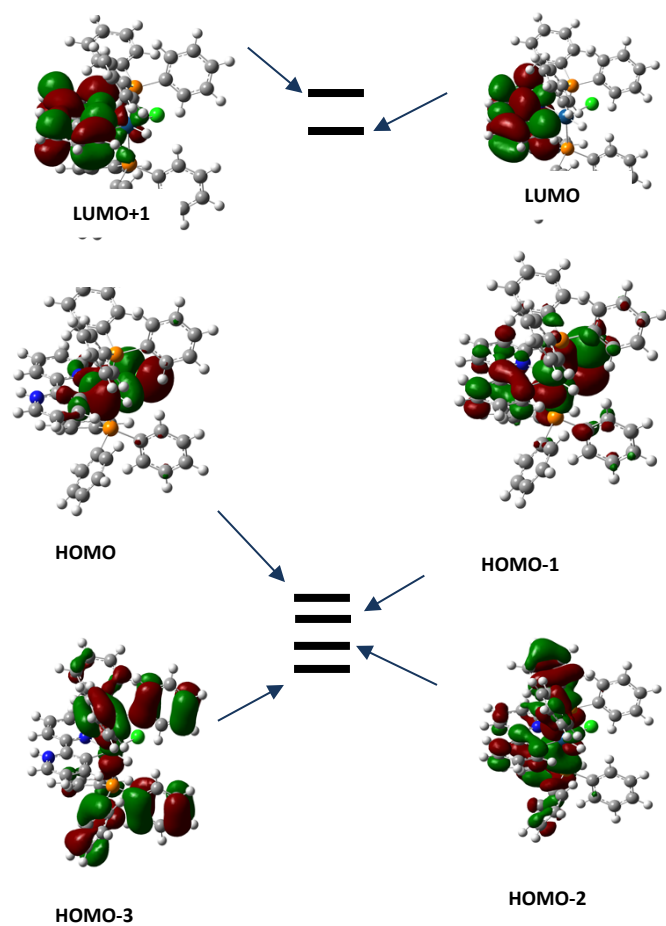

**Fig.S9** Highest and lowest occupied molecular orbitals of [Ir(bipy-H)H<sup>+</sup>]

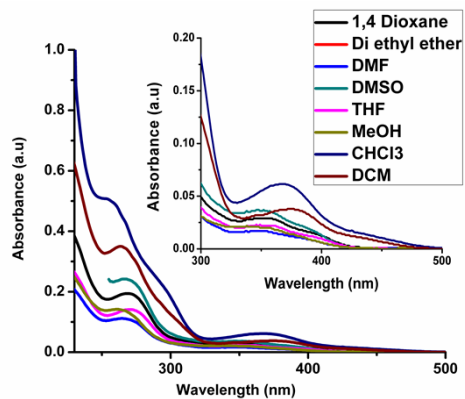

**Fig.S10** Absorbance spectra of  $[\text{Ir}(\text{bipy-H})\text{H}^+]$  in different solvents.

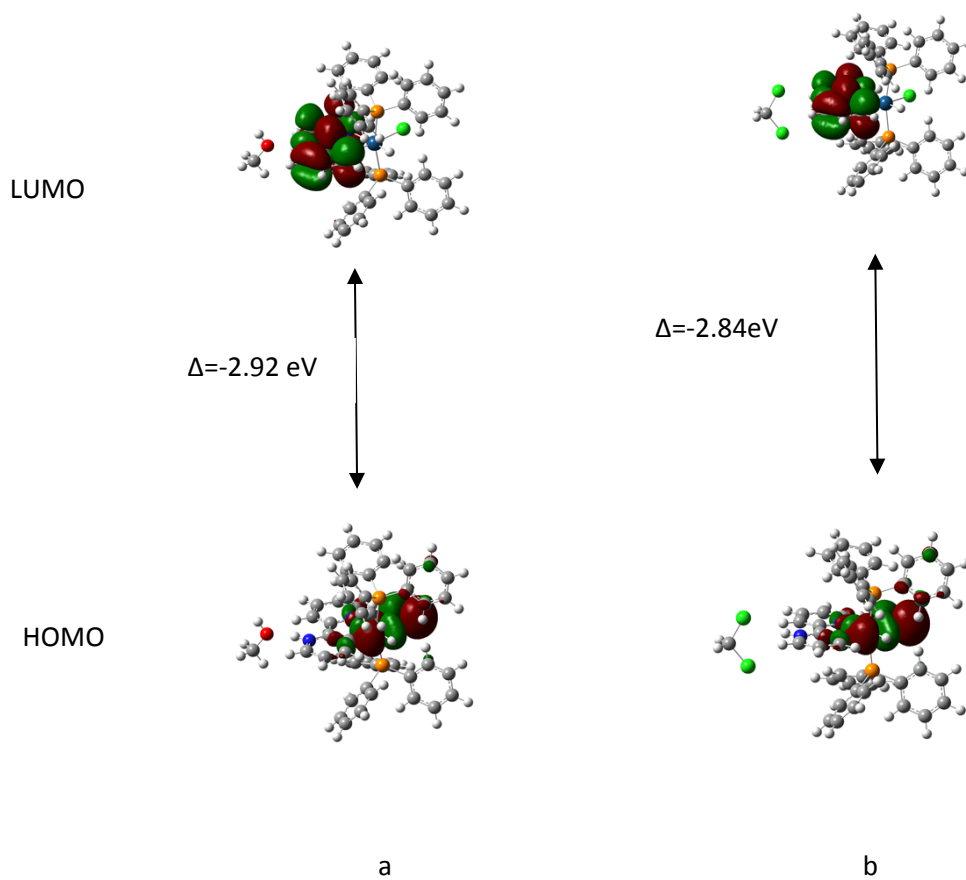

**Fig.S11** Highest and lowest occupied molecular orbitals of (a)  $[\text{Ir}(\text{bipy-H})\text{H}^+]\cdot\text{MeOH}$  and (b)  $[\text{Ir}(\text{bipy-H})\text{H}^+]\cdot\text{DCM}$

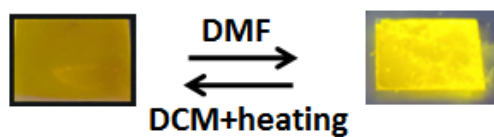

a

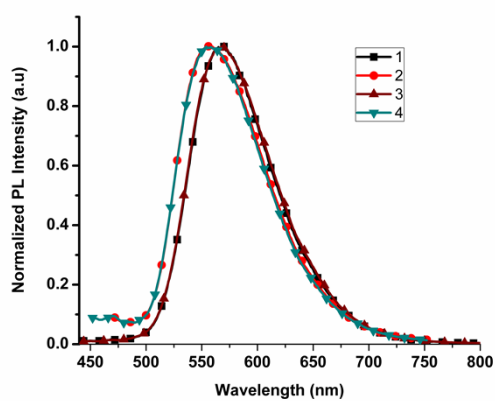

i

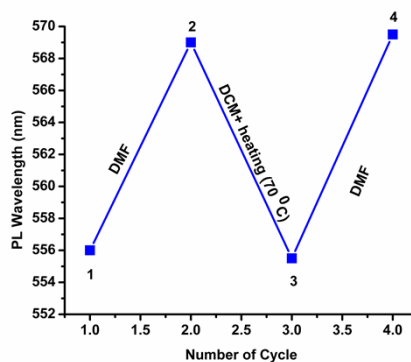

ii

b

**Fig. S12.** Solid-state reversal of emission color of  $[\text{Ir}(\text{bipy-H})\text{H}^+]$  from orangish yellow to yellow (on exposure to DMF) and orangish yellow to yellow (on exposure to DCM with 50 °C heating) (the photograph was taken under excitation of 364nm); **b (1).** Reversibility of solid-state emission spectrum of  $[\text{Ir}(\text{bipy-H})\text{H}^+]$  with repeated VOC exposure (2, on exposure to DMF; (3, on exposure to DCM after heating the film at 70°C for 10 min and (4, on exposure to DMF); **(2).** Switching of emission wavelength (~569 nm to ~555 nm and vice versa) on exposure to DMF and DCM repeatedly, respectively



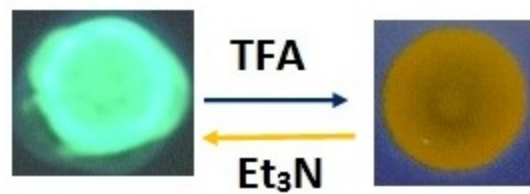

a

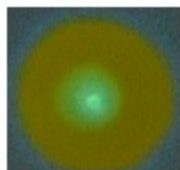

b

**Fig. S13 (a)** The TLC plate Image of [Ir(bipy-H)] , the greenish blue emission color of the complex is converted into yellowish orange color after the exposure of TFA and convert back to greenish blue after exposure of Et<sub>3</sub>N( fully reversible in nature) **(b)** A small drop of Et<sub>3</sub>N on TLC plate containing [Ir(bipy-H)]H<sup>+</sup> showing the partial colour change.

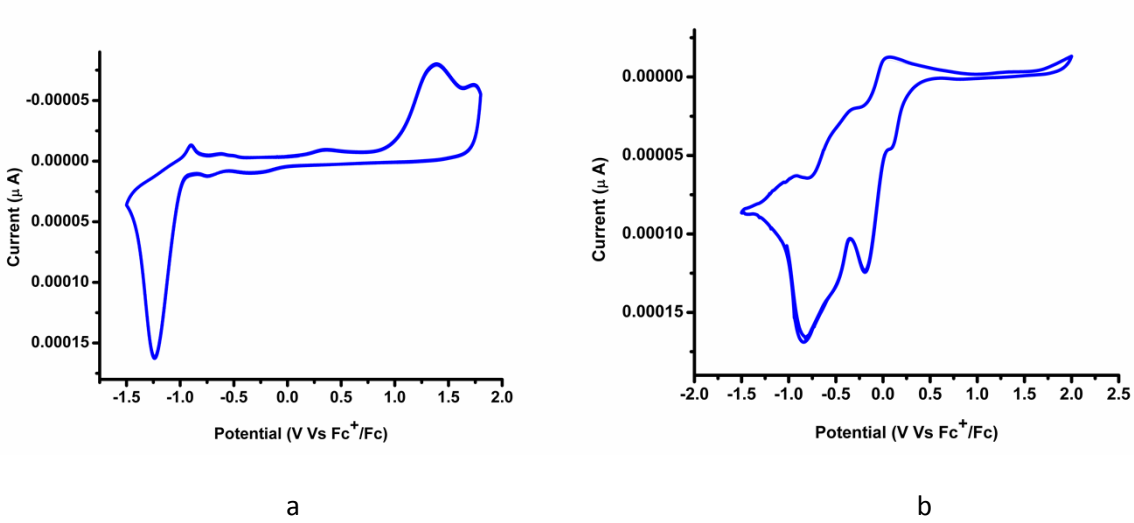

**Fig.S14** Cyclic voltammogram of [Ir(bipy-H)] (a) and of [Ir(bipy-H)H<sup>+</sup>] (b) respectively, recorded in ACN at a scan rate of 0.05 V s<sup>-1</sup>

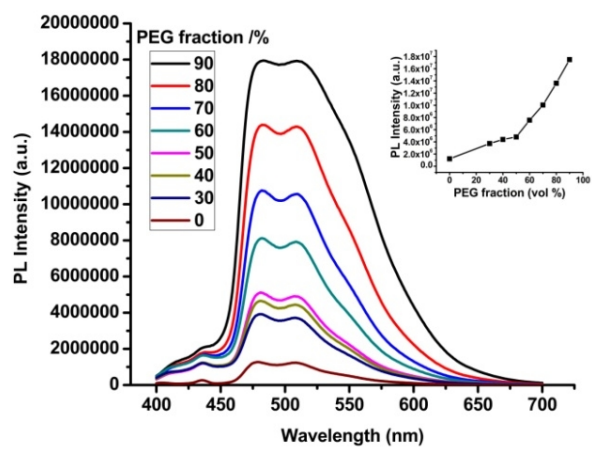

**Fig.S15** PL spectra of [Ir(bipy-H)] with [M] = 10<sup>-5</sup> mol L<sup>-1</sup> in THF-PEG mixtures, PEG fraction ( $f_{\text{PEG}}$ )

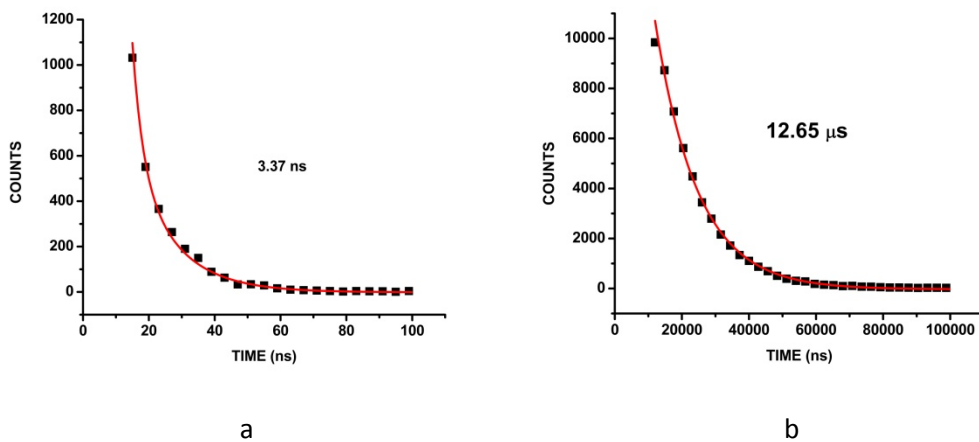

**Fig. S16** Photoluminescence lifetime decay curves (a) in THF and (b) in  $f_w=95\%$  for  $[\text{Ir}(\text{bipy-H})]$  (the red line is the fitting curve).

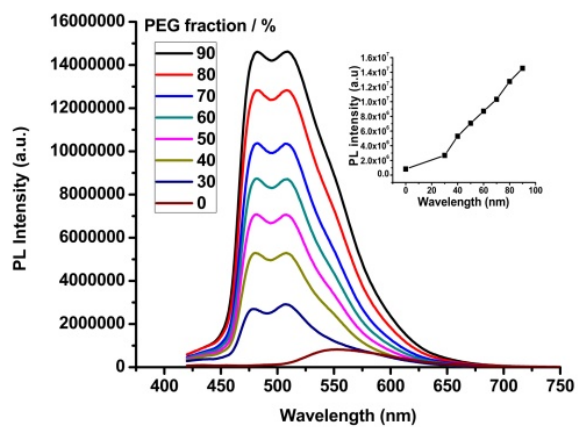

**Fig. S17** PL spectra of  $[\text{Ir}(\text{bipy-H})\text{H}^+]$  with  $[\text{M}] = 10^{-5} \text{ mol L}^{-1}$  in THF-PEG mixtures, PEG fraction ( $f_{\text{PEG}}$ )

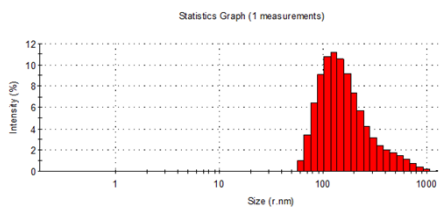

a

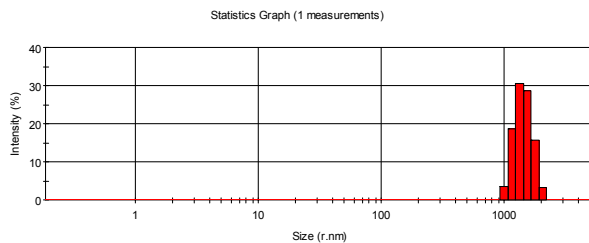

b

**Fig. S18 (a)** Particle size distribution of nano-aggregates of complexes ] in a THF/ water mixture with a 90% water fraction (a)

[Ir(bipy-H)] (b) [Ir(bipy-H)H<sup>+</sup>]

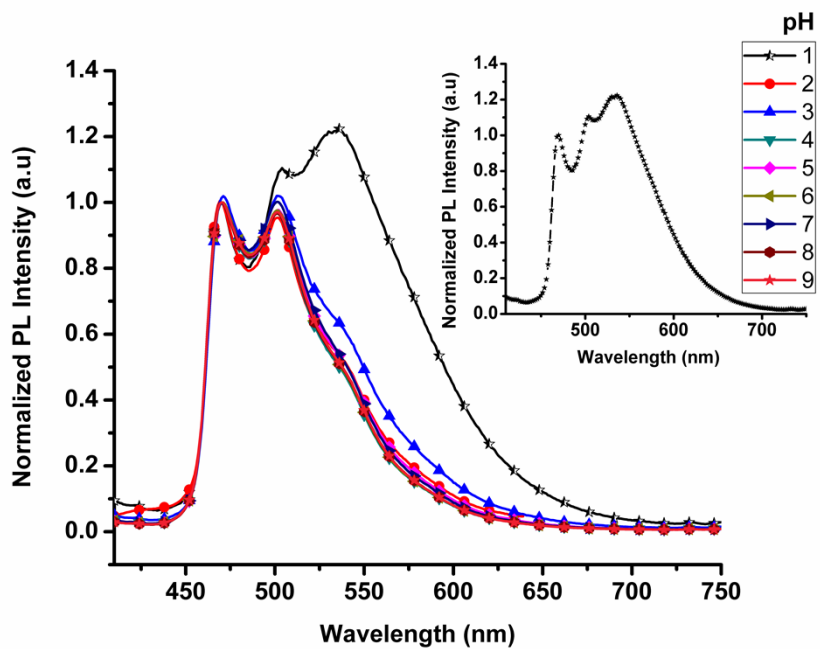

a

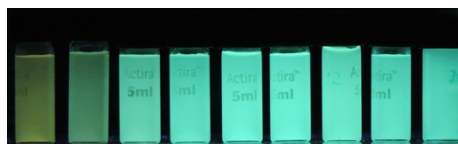

B

**Fig. S19 (a).** Emission spectra of [Ir(bipy-H)] in THF buffer mixture with different pH (1-9) (b) photo of the buffer solutions with THF,  $f_w = 90\%$  (pH= 1-9) under 365 nm UV lamp.

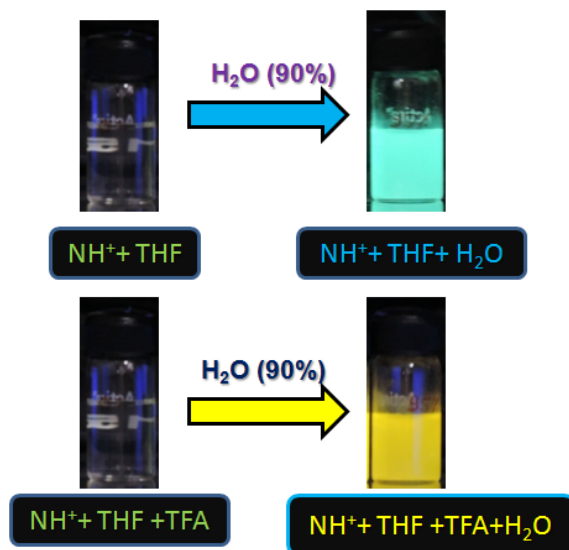

**Fig. S20 (a)** Emission spectra of [Ir(bipy-H)] in THF buffer mixture with different pH (1-9) (b) photo of the buffer solutions with THF,  $f_w = 90\%$  (pH= 1-9) under 365 nm UV lamp.

**Table 1.** Geometrical parameters for the coordination environment of Iridium in the optimized ground state structures of compounds [Ir(bipy-H)] and [Ir(bipy-H)H<sup>+</sup>] in dichloromethane solution.

| Bond length | (Exp.)                      | (Theoretical)               | Bond angle | (Exp.)                      | (Theoretical)               |
|-------------|-----------------------------|-----------------------------|------------|-----------------------------|-----------------------------|
|             | [Ir(bipy-H)H <sup>+</sup> ] | [Ir(bipy-H)H <sup>+</sup> ] |            | [Ir(bipy-H)H <sup>+</sup> ] | [Ir(bipy-H)H <sup>+</sup> ] |
| Ir-P1       | 2.339                       | 2.405                       | P1IrP2     | 174.21                      | 168.02                      |
| Ir-P2       | 2.330                       | 2.403                       | P1IrC      | 89.20                       | 93.95                       |
| Ir-N        | 2.167                       | 2.232                       | P1IrCl     | 89.49                       | 86.92                       |
| Ir-C        | 1.994                       | 2.022                       | P1IrN      | 95.15                       | 94.92                       |
| Ir-Cl       | 2.456                       | 2.539                       | P2IrN      | 90.62                       | 95.55                       |
| Ir-H        | 1.521                       | 1.588                       | P2IrCl     | 89.12                       | 87.23                       |
| N-H         | 0.860                       | 1.017                       | ClIrN      | 96.63                       | 90.46                       |
|             |                             |                             | ClIrC      | 175.45                      | 169.05                      |
|             |                             |                             | NIrC       | 79.24                       | 78.58                       |

**Table S2.** Vertical excitation energies, oscillator strengths and contributions ( $\geq 5\%$ ) to the electronic transitions of the two studied complexes

| molecule                    | states               | $\Delta E$ , eV (nm) | f                             | Assignments                       |
|-----------------------------|----------------------|----------------------|-------------------------------|-----------------------------------|
| [Ir(bipy-H)]                | <b>T<sub>1</sub></b> | 2.84 (436)           |                               | HOMO-3 $\rightarrow$ LUMO (13%)   |
|                             |                      |                      |                               | HOMO $\rightarrow$ LUMO (76%)     |
|                             | <b>T<sub>2</sub></b> | 3.36 (368)           |                               | HOMO-4 $\rightarrow$ LUMO (3%)    |
|                             |                      |                      |                               | HOMO-1 $\rightarrow$ LUMO (93%)   |
|                             | <b>S<sub>1</sub></b> | 3.42 (362)           | 0.0001                        | HOMO-1 $\rightarrow$ LUMO (98%)   |
| <b>S<sub>2</sub></b>        | 3.43(360)            | 0.073                | HOMO $\rightarrow$ LUMO (96%) |                                   |
| [Ir(bipy-H)H <sup>+</sup> ] | <b>T<sub>1</sub></b> | 2.23 (534)           |                               | HOMO-2 $\rightarrow$ LUMO (23%)   |
|                             |                      |                      |                               | HOMO-1 $\rightarrow$ LUMO (60%)   |
|                             | <b>T<sub>2</sub></b> | 2.58 (479)           |                               | HOMO $\rightarrow$ LUMO+1 (98%)   |
|                             | <b>S1</b>            |                      |                               |                                   |
|                             | <b>S2</b>            |                      |                               |                                   |
|                             |                      | 2.76 (449)           | 0.014                         | HOMO -2 $\rightarrow$ LUMO (2 %)  |
|                             |                      |                      |                               | HOMO-1 $\rightarrow$ LUMO (95%)   |
|                             |                      | 2.95 (420)           | 0.037                         | HOMO -2 $\rightarrow$ LUMO (95 %) |

**Table S2.** Ground State energy and electrochemical data for both the complexes

| Complex                     | DFT                     |              |                |                        |                           | Experimental       |                     |                           |                           |
|-----------------------------|-------------------------|--------------|----------------|------------------------|---------------------------|--------------------|---------------------|---------------------------|---------------------------|
|                             | $\Delta E$ , eV<br>(nm) | Osc.<br>Str. | %HOMO-<br>LUMO | $E_{\text{HOMO}}$ , eV | $E_{\text{LUMO}}$ ,<br>eV | $^a E_{\text{ox}}$ | $^a E_{\text{red}}$ | $^a E_{\text{HOMO}}$ , eV | $^a E_{\text{LUMO}}$ , eV |
| [Ir(bipy-H)]                | 3.42<br>(362)           | 0.0001       | 98             | -5.73                  | -1.62                     | 1.37               | -1.23               | -5.63                     | -2.7                      |
| [Ir(bipy-H)H <sup>+</sup> ] | 2.76<br>(449)           | 0.0140       | 95             | -6.45                  | -3.12                     | 1.34               | -0.82               | -5.60                     | -3.0                      |

<sup>a</sup>All electrochemical potentials were measured in degassed 0.1 M LiClO<sub>4</sub> (supporting electrolyte) / CH<sub>3</sub>CN solution for oxidation and reduction reactions using ferrocene / ferrocenium ion as an internal reference. HOMO (eV) =  $-e(E_{\text{onsetox}} + 4.8)$  V,  $E_g = 1240/\lambda$ , LUMO(eV) =  $E_g + \text{HOMO}$
